# Supplementary material
Source: Royal Society of Chemistry journal article supplement (doi:10.1039/d6ay00530f)
Supplement: d6ay00530f1.pdf [file d6ay00530f1.pdf]

## Supporting Information

# Ultrasensitive SERS-Immunochromatographic Assay for Pesticide Detection Using Core-Shell Au@Au Nanoparticles: A 10<sup>3</sup>-Fold Sensitivity Boost Over LFA

### Table of contents

**Figure S1.** (a) Reproducibility test of the Raman peak at 1072 cm<sup>-1</sup> for the optimized Au<sup>MPBN</sup>@Au substrate. (b) Photograph of the Au<sup>MPBN</sup>@Au substrate.

**Figure S2.** Immunoprobe solution under coagulation.

**Figure S3.** Comparison of SERS performance between Au@MPBN and core-shell Au<sup>MPBN</sup>@Au

**Figure S4.** Photographs of packaged test strips after testing with lambda-cyhalothrin standard solutions at concentrations of 0 ppb and 10<sup>-2</sup> to 10<sup>4</sup> ppb.

**Figure S5.** Photographs of packaged test strips from actual samples tested with lambda-cyhalothrin standards at concentrations of 0 ppb and 10<sup>-2</sup> to 10<sup>4</sup> ppb. (a) Grape; (b) Eggplant; (c) Green pepper.

**Figure S6.** Graph of the relationship between Raman intensity of test strip test line and storage time in actual sample detection.

**Figure S7.** Specificity analysis of SERS-ICA.

**Table 1.** Comparison of spiked and predicted concentrations of lambda-cyhalothrin and the corresponding recovery rates.

**Table 2.** Comparison of spiked and predicted concentrations, corresponding recovery rates, and RSD values for blind sample detection of lambda-cyhalothrin.

**Figure S8.** Photographs of blind sample test strips for three actual samples, the 24 samples were obtained by spiking actual samples with 10, 100, and 1000 ppb (four replicates per concentration). (a) Grape; (b) Eggplant; (c) Green pepper.

**Figure S9.** Raman spectra of blind sample detection for three actual samples. (a, c, e) Original Raman spectra of grape, eggplant, and green pepper, respectively. (b, d, f) Raman peak intensities at  $1072\text{ cm}^{-1}$  for different groups of grape, eggplant, and green pepper, respectively.

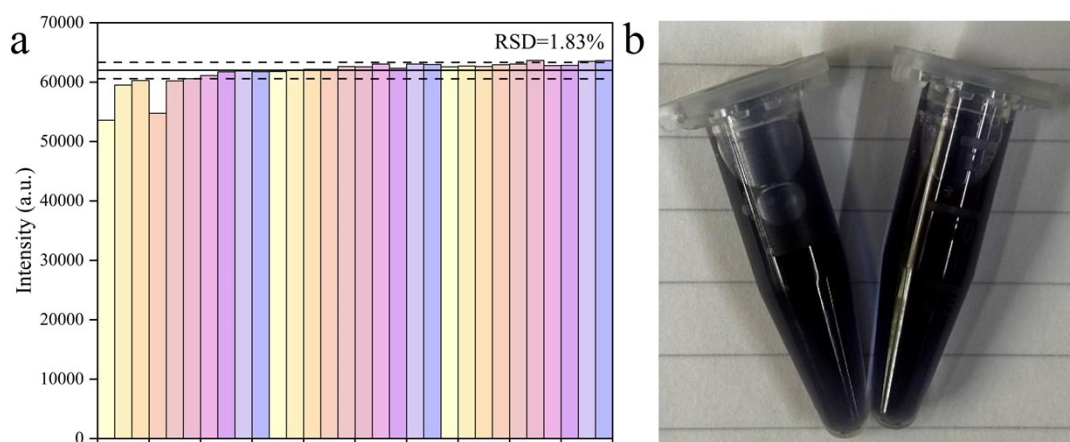

**Figure S1.** (a) Reproducibility test of the Raman peak at  $1072\text{ cm}^{-1}$  for the optimized  $\text{Au}^{\text{MPBN}}@Au$  substrate. (b) Photograph of the  $\text{Au}^{\text{MPBN}}@Au$  substrate.

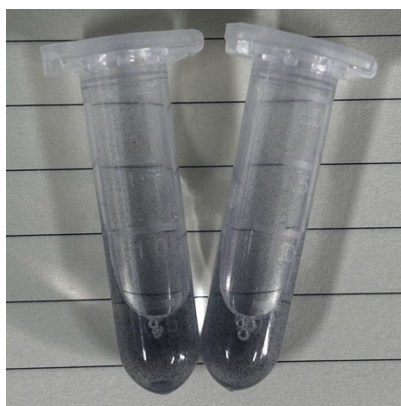

**Figure S2.** Immunoprobe solution under coagulation

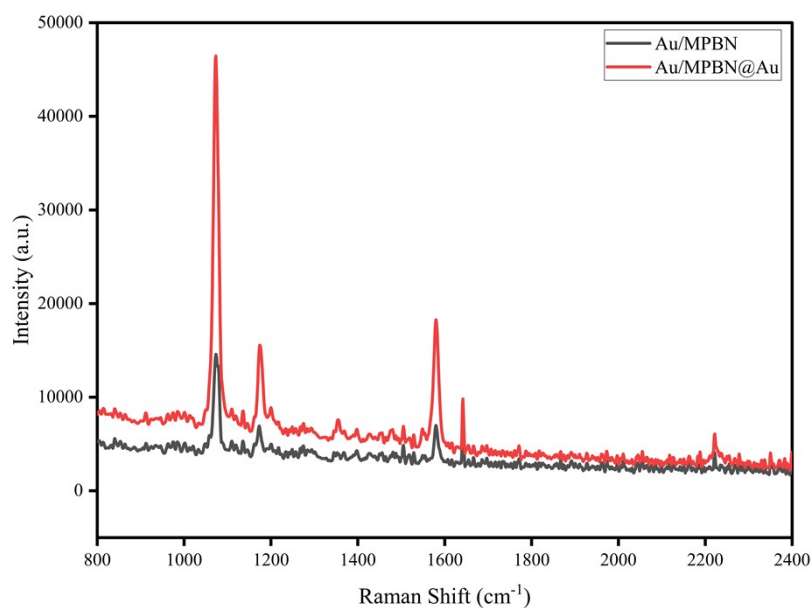

**Figure S3.** Comparison of SERS performance between Au@MPBN and core-shell Au<sup>MPBN</sup>@Au

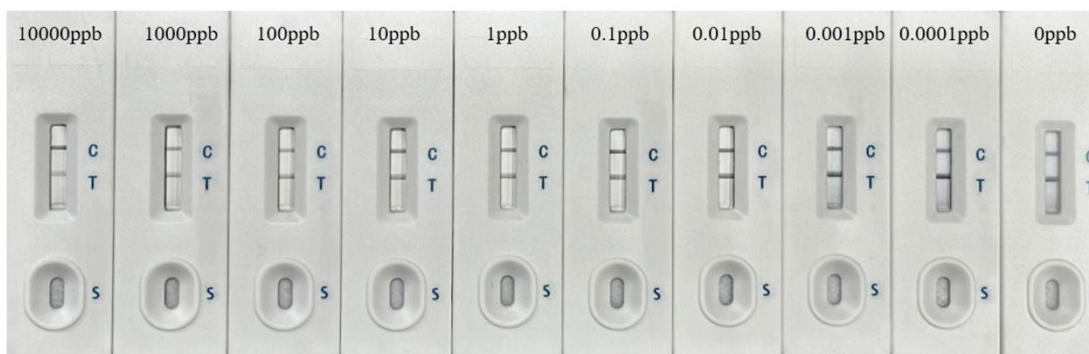

**Figure S4.** Photographs of packaged test strips after testing with lambda-cyhalothrin standard solutions at concentrations of 0 ppb and  $10^{-2}$  to  $10^4$  ppb.

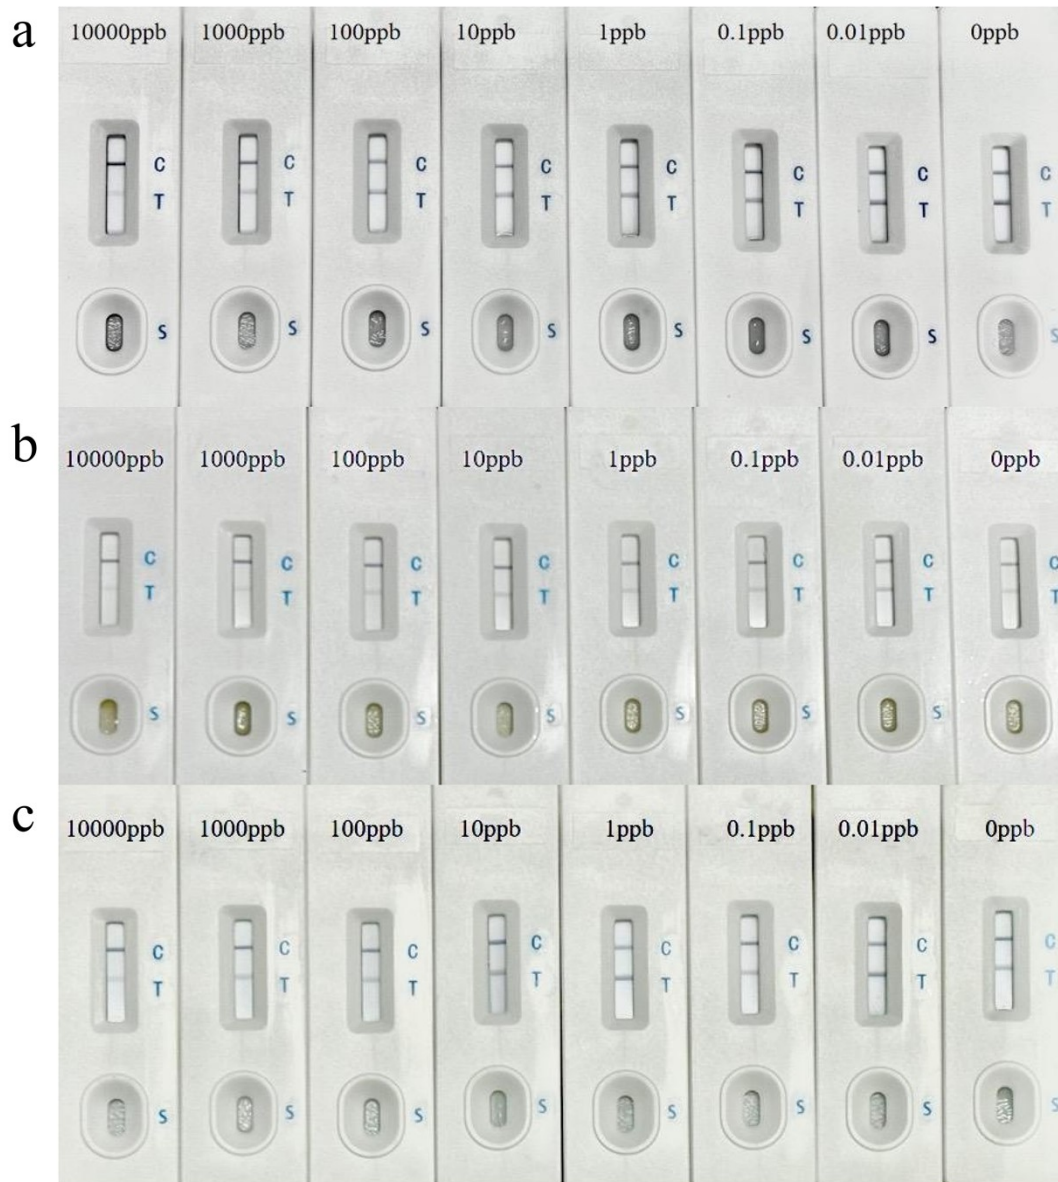

**Figure S5.** Photographs of packaged test strips from actual samples tested with lambda-cyhalothrin standards at concentrations of 0 ppb and  $10^{-2}$  to  $10^4$  ppb. (a) Grape; (b) Eggplant; (c) Green pepper.

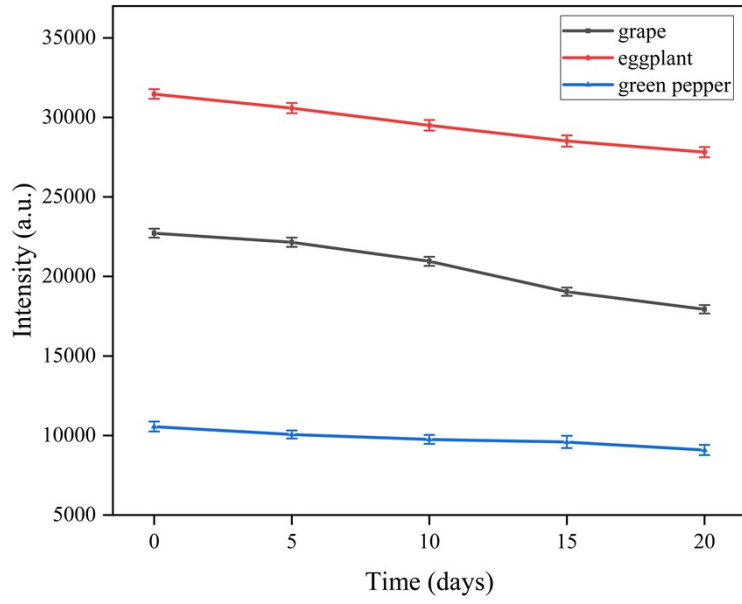

**Figure S6.** Graph of the relationship between Raman intensity of test strip test line and storage time in actual sample detection.

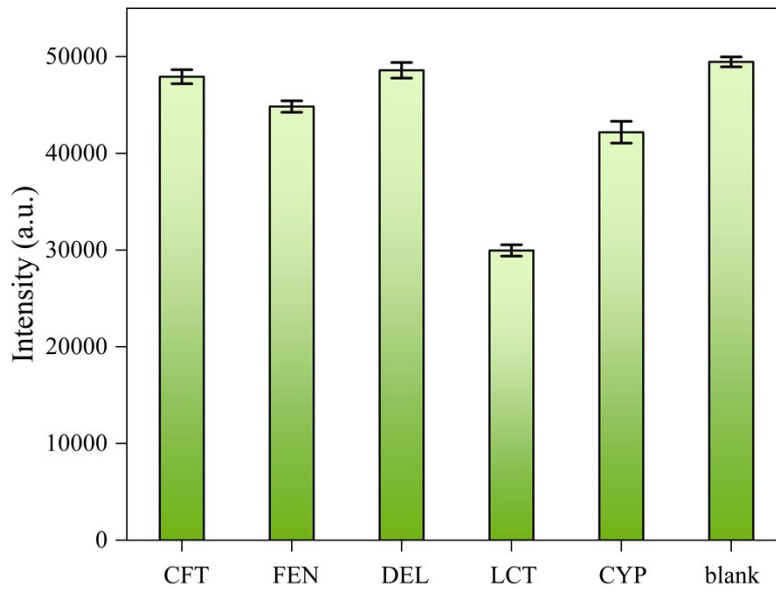

**Figure S7.** Specificity analysis of SERS-ICA.

**Table S1.** Comparison of spiked and predicted concentrations of lambda-cyhalothrin and the corresponding recovery rates.

| Sample       | Spiked concentrations (ppb) | Predicted concentrations (ppb) | Recovery <sup>a</sup> (%) |
|--------------|-----------------------------|--------------------------------|---------------------------|
| Grape        | 1                           | 0.83                           | 83.10                     |
|              | 10                          | 10.88                          | 108.80                    |
|              | 100                         | 111.06                         | 111.06                    |
|              | 1000                        | 980.23                         | 98.02                     |
|              | 10000                       | 8903.68                        | 89.04                     |
| Eggplant     | 1                           | 1.10                           | 110.00                    |
|              | 10                          | 9.75                           | 97.50                     |
|              | 100                         | 113.56                         | 113.56                    |
|              | 1000                        | 918.20                         | 91.82                     |
|              | 10000                       | 9487.65                        | 94.88                     |
| Green pepper | 1                           | 0.92                           | 92.00                     |
|              | 10                          | 9.24                           | 92.40                     |
|              | 100                         | 104.16                         | 104.16                    |
|              | 1000                        | 1047.55                        | 104.76                    |
|              | 10000                       | 9332.74                        | 93.33                     |

<sup>a</sup> Recovery = (Predicted concentration/Spiked concentration) × 100%.

**Table S2.** Comparison of spiked and predicted concentrations, corresponding recovery rates, and RSD values for blind sample detection of lambda-cyhalothrin.

| Sample       | Spiked concentrations (ppb) | Predicted concentrations (ppb) | Recovery (%) (mean $\pm$ SD, n = 4) | RSD (%) |
|--------------|-----------------------------|--------------------------------|-------------------------------------|---------|
| Grape        | 10                          | 9.39                           | 93.95 $\pm$ 15.20                   | 16.17   |
|              | 100                         | 92.85                          | 92.85 $\pm$ 8.02                    | 8.65    |
|              | 1000                        | 1017.33                        | 101.73 $\pm$ 4.09                   | 4.02    |
| Eggplant     | 10                          | 9.3                            | 93 $\pm$ 9.48                       | 10.19   |
|              | 100                         | 105.83                         | 105.83 $\pm$ 15.12                  | 14.29   |
|              | 1000                        | 1043.5                         | 104.35 $\pm$ 11.30                  | 10.83   |
| Green pepper | 10                          | 11.825                         | 118.25 $\pm$ 13.28                  | 11.23   |
|              | 100                         | 107.185                        | 107.185 $\pm$ 15.41                 | 14.38   |
|              | 1000                        | 1028.6                         | 102.86 $\pm$ 12.99                  | 12.62   |

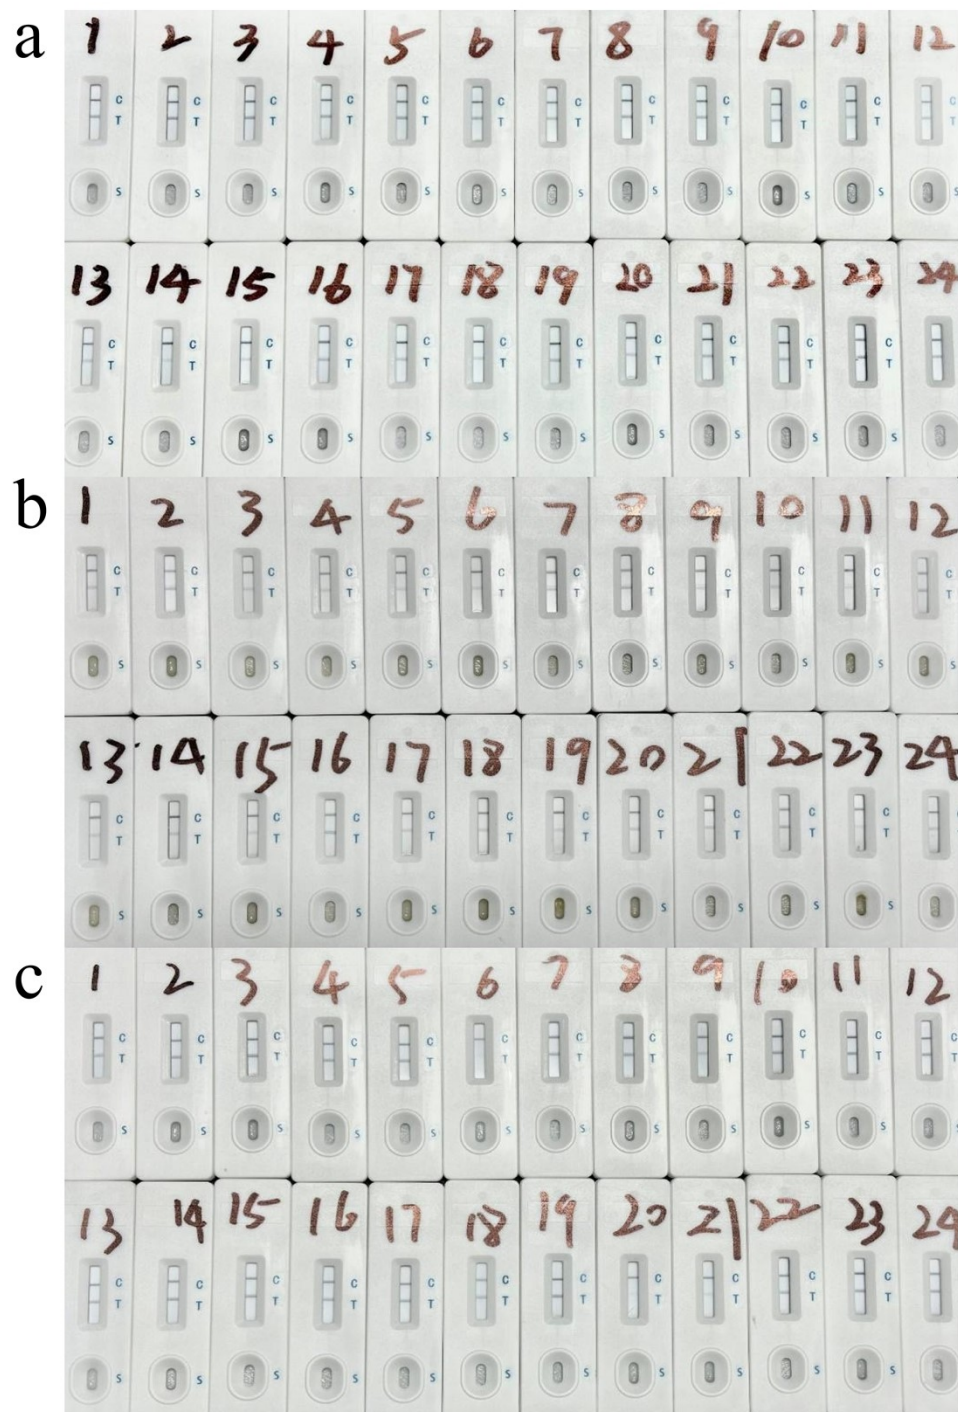

**Figure S8.** Photographs of blind sample test strips for three actual samples, the 24 samples were obtained by spiking actual samples with 10, 100, and 1000 ppb (four replicates per concentration). (a) Grape; (b) Eggplant; (c) Green pepper.

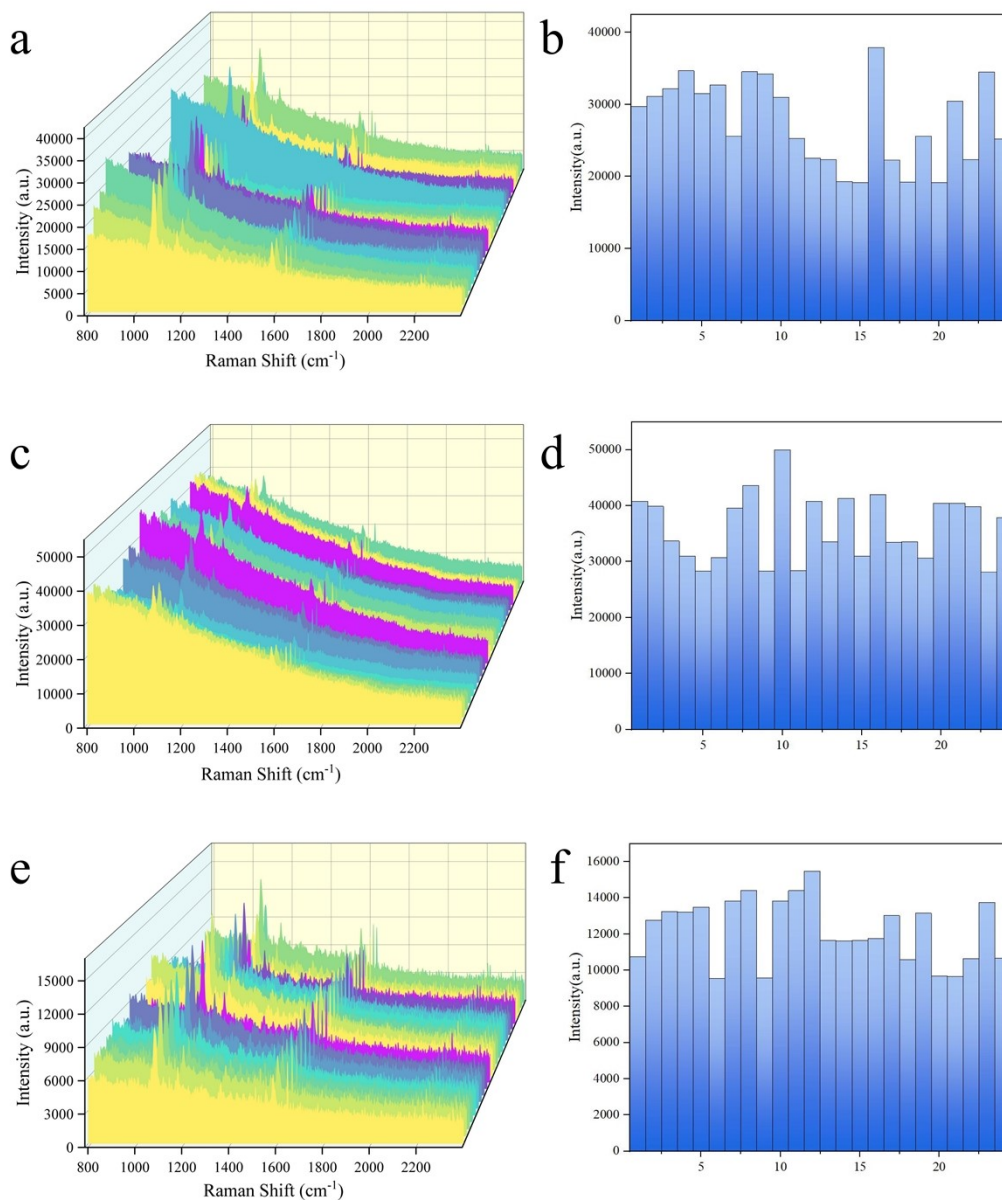

**Figure S9.** Raman spectra of blind sample detection for three actual samples. (a, c, e) Original Raman spectra of grape, eggplant, and green pepper, respectively. (b, d, f) Raman peak intensities at 1072 cm<sup>-1</sup> for different groups of grape, eggplant, and green pepper, respectively.
